# Supplementary material for: Investigation of routing reliability of vehicular ad hoc networks
Source: Springer Nature journal article supplement (doi:10.1186/1687-1499-2013-179), 2013-07-01
Supplement: 13638_2013_753_MOESM5_ESM.pdf [file 13638_2013_753_MOESM5_ESM.pdf]

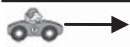

40 km/h

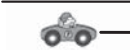

60 km/h

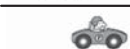

80 km/h

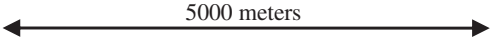

5000 meters
