# Supplementary material for: Investigation of routing reliability of vehicular ad hoc networks
Source: Springer Nature journal article supplement (doi:10.1186/1687-1499-2013-179), 2013-07-01

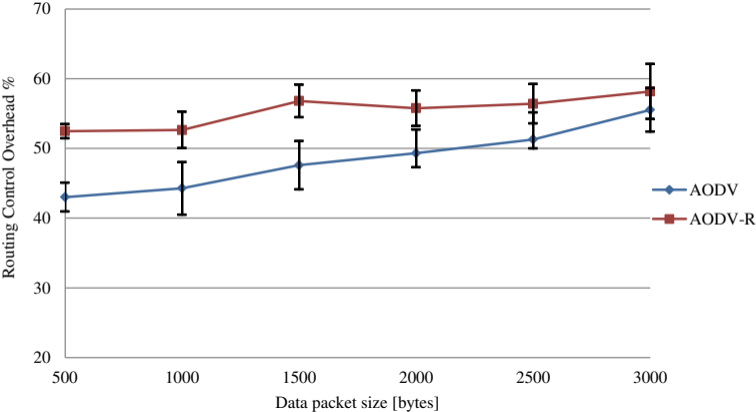

Supplement: 13638_2013_753_MOESM13_ESM.pdf [file 13638_2013_753_MOESM13_ESM.pdf]
